# Supplementary material
Source: PubMed Central journal article supplement (PMC7965644)
Supplement: 3342_tables.pdf [file 3342_tables.pdf]

**On-line Table 1: Concentration ratios and absolute metabolite concentrations in healthy volunteers**

| Publication                       | B0, Position, Volunteers                | TE/TR (ms)         | SNR     | FWHM/ppm    | NAA/Cr (mean) |
|-----------------------------------|-----------------------------------------|--------------------|---------|-------------|---------------|
| Hock et al <sup>30,a</sup>        | 3T, C3-4, n = 13 (non-water suppressed) | 30, ~2500          | 7 ± 1   | 0.07 ± 0.02 | 1.5 ± 0.2     |
| Hock et al <sup>30,a</sup>        | 3T, C3-4, n = 13 (VAPOR)                | 30, ~2500          | 6.1 ± 1 | 0.08 ± 0.01 | 1.6 ± 0.3     |
| Marliani et al <sup>21,a</sup>    | 3T, C2-3, n = 13                        | 35, 2000           | 4.0 ± 1 | 0.10 ± 0.02 | 1.4 ± 0.3     |
| Henning et al <sup>17,a</sup>     | 3T, entire cervical spinal cord, n = 8  | 42, ~2000          | –       | 0.06 ± 0.11 | 1.2 ± 0.1     |
| Carew et al <sup>22,a</sup>       | 3T, C1-2, n = 19                        | 35, 2000           | –       | <0.12       | 1.3 ± 0.4     |
| de Vita et al <sup>23</sup>       | 3T, C1-3, n = 14                        | 30, ~3000          | –       | ~0.11 ± 0.2 | 1.2 ± 0.3     |
| Cooke et al <sup>5,a</sup>        | 2T, C1-2, n = 6                         | 30, ~3000          | –       | –           | –             |
| Blamire et al <sup>16,a</sup>     | 2T, C1-3, n = 11                        | 30, ~3000          | –       | –           | –             |
| Gómez-Ansón et al <sup>10,a</sup> | 1.5T, C2-3, n = 6                       | 30, 3000           | –       | –           | 1.3 ± 0.5     |
| Edden et al <sup>26,a</sup>       | 3T, C2-3, n = 10                        | 144, 2200          | –       | –           | –             |
| Pineda-Alonso et al <sup>27</sup> | 3T, C1-2, n = 6                         | 35, 2000           | –       | –           | 1.3 ± 0.5     |
| Ciccarelli et al <sup>9,a</sup>   | 1.5T, C1-3, n = 12                      | 30, ~3000          | –       | –           | –             |
| Rapalino et al <sup>15</sup>      | 1.5T, C3, n = 20                        | 30, ~590           | –       | –           | 2.1 ± 0.4     |
| Rapalino et al <sup>15</sup>      | 3T, C3, n = 20                          | 30, ~590           | –       | –           | 1.7 ± 0.6     |
| Holly et al <sup>11,a</sup>       | 1.5T, C1-2, n = 13                      | 30, ~1500 or ~3000 | –       | ~0.28~0.44  | 1.8 ± 0.2     |
| Kim et al <sup>3,a</sup>          | 1.5T, L1-2                              | 30, 2000           | –       | ~0.10-0.20  | –             |

**Note:**—Studies in which ECG triggering was used are labeled with ~ before TR values. Studies with quality indicators attesting sufficient spectral quality for reliable metabolite quantification are listed in the upper part of the table. Studies without quality indicators should be interpreted with caution. iu indicates institutional units; mlins, myo-inositol; VAPOR, asymmetric variable power RF pulses with optimized relaxation delays.

<sup>a</sup>References published as full articles.

**On-line Table 1, continued**

| NAA/Cho (mean) | Cho/Cr (mean) | mlins/Cr (mean) | NAA (mean, mean CRLB)  | Cr (mean, mean CRLB)   | Cho (mean, mean CRLB)  | mlins (mean, mean CRLB) |
|----------------|---------------|-----------------|------------------------|------------------------|------------------------|-------------------------|
| –              | 0.4 ± 0.1     | 2.8 ± 0.4       | –, 6%                  | –                      | –, 7%                  | –, 7%                   |
| –              | 0.4 ± 0.1     | 3.0 ± 0.4       | –, 7%                  | –                      | –, 12%                 | –, 8%                   |
| 3.1 ± 0.8      | 0.5 ± 0.1     | 1.7 ± 0.2       | 6.8 ± 1.6 iu, 13%      | 4.8 ± 0.6 iu, 13%      | 2.2 ± 0.4 iu, 10%      | 8.0 ± 1.1 iu, 12%       |
| 4.9 ± 1.3      | 0.3 ± 0.1     | 1.4 ± 0.6       | –, <25%                | –, <25%                | –, <25%                | –, <25%                 |
| 2.7 ± 0.9      | 0.5 ± 0.1     | 1.4 ± 0.4       | –, <25%                | –, <25%                | –, <25%                | –, <25%                 |
|                | 0.3 ± 0.1     | 1.3 ± 0.3       | –, <20%                | –, <20%                | –, <20%                | –, <20%                 |
|                |               | –               | 17.3 ± 0.5 mmol/L      | 9.5 ± 0.9 mmol/L, –    | 2.7 ± 0.5 mmol/L, –    | –                       |
|                |               |                 | 12.4 ± 2.3 mmol, –     | 7.1 ± 1.8 mmol, –      | 2.7 ± 0.3 mmol, –      | 6.1 ± 1.9 mmol, –       |
| –              | 0.5 ± 0.2     | 1.5 ± 0.8       | 2.9 ± 0.5 mmol/L, <35% | 2.6 ± 1.1 mmol/L, <35% | 1.1 ± 0.2 mmol/L, <35% | 3.6 ± 1.1 mmol/L, <35%  |
|                |               | –               | 10.0 ± 3.0 mmol, –     | 9.1 ± 3.0 mmol, –      | 3.1 ± 1.1 mmol, –      | –                       |
|                | 0.4 ± 0.01    | 1.0 ± 0.3       | 4.2 ± 1.6 mmol/L       | 3.6 ± 1.3 mmol/L, –    | 1.5 ± 0.5 mmol/L, –    | 3.8 ± 1.6 mmol/L, –     |
|                |               |                 | 6.7 ± 1.7 mmol/L, <50% | 3.2 ± 1.3 mmol/L, <50% | 1.2 ± 0.5 mmol/L, <50% | 4.8 ± 1.7 mmol/L, <50%  |
|                | 1.2 ± 0.4     | 0.8 ± 0.4       | –                      | –                      | –                      | –                       |
|                | 1.1 ± 0.3     | 0.7 ± 0.4       | –                      | –                      | –                      | –                       |
| –              | 1.0 ± 0.2     | –               | –                      | –                      | –                      | –                       |
| –              | –             | –               | –                      | –                      | –                      | –                       |

**On-line Table 2: Concentration ratios and absolute metabolite concentrations in patients having a variety of diseases or disorders in the spinal cord**

| Publication                     | Disease                            | B0, Position, Volunteers | TE/TR (ms)         | SNR   | FWHM/ppm     | NAA/Cr (mean) |
|---------------------------------|------------------------------------|--------------------------|--------------------|-------|--------------|---------------|
| Marliani et al <sup>20,a</sup>  | MS in lesions                      | 3T, C2–3, n = 15         | 35, 2000           | 4 ± 1 | 0.11 ± 0.02  | 1.1 ± 0.3 ↓   |
| Hock et al <sup>33</sup>        | MS in normal-appearing spinal cord | 3T, C3–4, n = 13         | 30, ~2000          | 4 ± 1 | 0.10 ± 0.02  | 1.3 ± 0.4     |
| Carew et al <sup>22,a</sup>     | Amyotrophic lateral sclerosis      | 3T, C1–2, n = 14         | 35, 2000           | –     | <0.12        | 0.8 ± 0.3 ↓   |
| Hock et al <sup>33</sup>        | Ependymoma (WHO II)                | 3T, C3–4, n = 1          | 30, ~2000          | 4     | 0.07         | 1.3           |
| Hock et al <sup>33</sup>        | Schwannoma (WHO II)                | 3T, T11, n = 1           | 30, ~2000          | 5     | 0.14         | –             |
| Hock et al <sup>33</sup>        | Tumor (not specified)              | 3T, C4–5, n = 1          | 30, ~2000          | 3     | 0.09         | 0.7           |
| Hock et al <sup>33</sup>        | Tumor (not specified)              | 3T, C4–5, n = 1          | 30, ~2000          | 3     | 0.08         | 0.5           |
| Blamire et al <sup>16,a</sup>   | MS                                 | 2T, C1–3, n = 11         | 30, ~3000          | –     | –            | –             |
| Rapalino et al <sup>13</sup>    | Cervical spondylosis               | 1.5T, C3, n = 8          | 30, ~590           | –     | –            | 1.0 ± 0.3 ↓   |
| de Vita et al <sup>23</sup>     | Brachial plexus avulsion           | 3T, C1–3, n = 8          | 30, ~3000          | –     | ~0.11 ± 0.20 | 1.2 ± 0.4     |
| Henning et al <sup>17,a</sup>   | Tumor                              | 3T, T9, n = 1            | 42, ~2000          | –     | ~0.09        | 0.5           |
| Henning et al <sup>17,a</sup>   | Tumor                              | 3T, C4–5, n = 1          | 42, ~2000          | –     | –            | 1.9           |
| Ciccarelli et al <sup>9,a</sup> | MS                                 | 1.5T, C1–3, n = 14       | 30, ~3000          | –     | –            | –             |
| Holly et al <sup>11,a</sup>     | Spondylotic myelopathy             | 1.5T, C1–2, n = 21       | 30, ~1500 or ~3000 | –     | ~0.28–~0.44  | 1.3 ± 0.5 ↓   |

**Note:**—Arrows represent significant changes (if provided in the original publication) compared with healthy subjects. Studies in which ECG triggering was used are labeled with ~ before TR values. Studies with quality indicators attesting sufficient spectral quality for reliable metabolite quantification are listed in the upper part of the table. Studies without quality indicators should be interpreted with caution. WHO indicates World Health Organization; mIns, myo-inositol.

<sup>a</sup>References published as full articles.

**On-line Table 2, continued**

| NAA/Cho (mean) | Cho/Cr (mean) | mIns/Cr (mean) | NAA (mean, mean CRLB)    | Cr (mean, mean CRLB)   | Cho (mean, mean CRLB)  | mIns (mean, mean CRLB) |
|----------------|---------------|----------------|--------------------------|------------------------|------------------------|------------------------|
| 2.0 ± 0.7 ↓    | 0.6 ± 0.1 ↑   | 2.0 ± 0.4 ↑    | –                        | –                      | –                      | –                      |
|                | 0.5 ± 0.1     | 3.6 ± 0.7      | –, 14%                   | –                      | –, 11%                 | –, 9%                  |
| 2.3 ± 0.7      | 0.4 ± 0.1 ↓   | 1.4 ± 0.5      | –, <25%                  | –, <25%                | –, <25%                | –, <25%                |
|                | 1.5           | 12.8           | –, 35%                   | –                      | –, 15%                 | –, 11%                 |
|                | 0.5           | 3.8            | –, 28%                   | –, 13%                 | –, 9%                  | –, 8%                  |
|                | 0.6           | 4.7            | –, 36%                   | –, 14%                 | –, 10%                 | –, 7%                  |
|                |               |                | 8.5 ± 2.8 ↓ mmol–        | 4.9 ± 2.1 mmol,–       | 2.3 ± 0.8 mmol,–       | 6.3 ± 2.3 mmol,–       |
|                | 1.5 ± 0.6     | 0.5 ± 0.4      | –                        | –                      | –                      | –                      |
| –              | 0.3 ± 0.1     | 1.9 ± 0.4 ↑    | –, <20%                  | –, <20%                | –, <20%                | –, <20%                |
| 1.1            | 0.4           | 1.0            | –                        | –                      | –                      | –                      |
| 1.9            | 1.0           | 12.9           | –                        | –                      | –                      | –                      |
| –              | 1.0 ± 0.3     | –              | 4.1 ± 0.7 ↓ mmol/L, <50% | 3.4 ± 1.2 mmol/L, <50% | 1.3 ± 0.6 mmol/L, <50% | 6.0 ± 3.0 mmol/L, <50% |
|                |               |                | –                        | –                      | –                      | –                      |
